# Supplementary material for: Atrx inactivation drives disease-defining phenotypes in glioma cells of origin through global epigenomic remodeling
Source: PubMed Central journal article supplement (PMC5849741; doi:10.1038/s41467-018-03476-6), 2018-03-13
Supplement: 41467_2018_3476_MOESM1_ESM.pdf [file 41467_2018_3476_MOESM1_ESM.pdf]

# **Atrx inactivation drives disease-defining phenotypes in glioma cells of origin through global epigenomic remodeling**

Danussi C et al.

## **Supplementary Information**

### **Contents**

Supplementary Tables: pp. 2-3

Supplementary Figures: pp. 4-14

| gene     | p-value     | fold change | chr   | trans start | trans stop | ATAC Closed | ATAC Open | Atrx ChIP |
|----------|-------------|-------------|-------|-------------|------------|-------------|-----------|-----------|
| APOE     | 0.000233264 | 7.62E+159   | chr7  | 20273596    | 20293596   | 0           | 8072.37   | 1.75E+07  |
| Rnd2     | 9.49E-05    | 1.11E+16    | chr11 | 101316312   | 101336312  | 0           | 13662.8   | 3.36E+06  |
| Mfge8    | 1.92E-05    | 4.04E+15    | chr7  | 86283946    | 86303946   | 0           | 3574.48   | 703953    |
| Agt      | 3.19E-05    | 2.70E+12    | chr8  | 127083606   | 127103606  | 0           | 2902.71   | 2.94E+06  |
| TRAF4    | 0.000440314 | 1.30E+07    | chr11 | 77969018    | 77989018   | 0           | 6661.14   | 1.40E+07  |
| Fgfr3    | 0.000193534 | 856082      | chr5  | 34054372    | 34074372   | 0           | 3563.29   | 1.94E+06  |
| Carhsp1  | 8.79E-07    | 197904      | chr16 | 8662246     | 8682246    | 0           | 6206.48   | 1.96E+06  |
| DDR1     | 0.00839422  | 4871.93     | chr17 | 35827497    | 35847497   | 2073.71     | 9895.72   | 2.25E+07  |
| Zfp703   | 0.000155961 | 1948.75     | chr8  | 28077807    | 28097807   | 16190.8     | 8558.01   | 1.05E+07  |
| Tyro3    | 9.15E-06    | 1878.75     | chr2  | 119613468   | 119633468  | 0           | 6374.52   | 3.75E+06  |
| Plxb3    | 1.70E-05    | 1275        | chrX  | 70992428    | 71012428   | 0           | 9026.8    | 1.87E+06  |
| PTGDS    | 0.000881781 | 880.492     | chr2  | 25314677    | 25334677   | 0           | 13478.1   | 2.60E+06  |
| Vat1     | 0.000655119 | 859.256     | chr11 | 101317544   | 101337544  | 0           | 8831.87   | 946019    |
| Nkx6-2   | 3.33E-06    | 393.774     | chr7  | 146758689   | 146778689  | 4642.27     | 2529.03   | 178753    |
| Emp1     | 6.26E-05    | 262.731     | chr6  | 135302948   | 135322948  | 0           | 6992.24   | 5.70E+06  |
| CDK5     | 0.000150548 | 244.195     | chr5  | 23919348    | 23939348   | 0           | 1928.62   | 836143    |
| Hspa2    | 0.00100924  | 151.225     | chr12 | 77495162    | 77515162   | 0           | 5348.84   | 2.96E+06  |
| Emilin1  | 0.000135772 | 148.816     | chr5  | 31205774    | 31225774   | 0           | 10762.3   | 1.80E+06  |
| Cdkn1c   | 6.13E-06    | 114.475     | chr7  | 150636955   | 150656955  | 0           | 9622.99   | 142871    |
| TMEM176B | 0.0058633   | 84.2633     | chr6  | 48778305    | 48798305   | 0           | 11953.2   | 2.91E+06  |
| GNA13    | 0.000226585 | 31.602      | chr11 | 109214144   | 109234144  | 2845.12     | 3874.08   | 2.25E+07  |
| NR1D1    | 5.28E-05    | 31.3837     | chr11 | 98621740    | 98641740   | 0           | 2061.39   | 2.26E+06  |
| Dpysl4   | 0.000293476 | 24.782      | chr7  | 146261899   | 146281899  | 0           | 5721.1    | 646879    |
| Rap1gap  | 0.000380142 | 24.1676     | chr4  | 137210640   | 137230640  | 1232.62     | 1951.07   | 2.87E+06  |
| Cyr61    | 4.22E-05    | 21.9173     | chr3  | 145302949   | 145322949  | 0           | 3846.3    | 1.15E+07  |
| ATG12    | 0.000383878 | 20.4283     | chr18 | 46891233    | 46911233   | 0           | 3369.51   | 2.35E+06  |
| RAC1     | 0.00590689  | 18.1129     | chr5  | 144268476   | 144288476  | 0           | 2995.2    | 1.85E+06  |
| Zmiz2    | 5.86E-05    | 16.657      | chr11 | 6279076     | 6299076    | 0           | 6549.82   | 125718    |
| STAT3    | 0.000514096 | 13.6311     | chr11 | 100741626   | 100761626  | 0           | 9028.35   | 7.16E+06  |
| Nkx2-1   | 4.38E-06    | 10.2444     | chr12 | 57627895    | 57647895   | 0           | 2059.05   | 112714    |
| Dpysl3   | 0.000100348 | 9.59497     | chr18 | 43543031    | 43563031   | 387.162     | 918.255   | 645196    |
| Plin3    | 3.16E-05    | 8.46429     | chr17 | 56419934    | 56439934   | 0           | 8731.07   | 1.39E+06  |
| PIK3R1   | 0.000423348 | 8.08984     | chr13 | 102452602   | 102472602  | 1442.9      | 1645.38   | 1.05E+07  |
| Pdgfra   | 0.00011443  | 6.74092     | chr5  | 75538315    | 75558315   | 0           | 10274.2   | 6.99E+06  |
| NTRK2    | 6.97E-05    | 6.18145     | chr13 | 58897956    | 58917956   | 0           | 3229.01   | 1.68E+07  |
| NOTCH1   | 0.00557255  | 5.35315     | chr2  | 26308267    | 26328267   | 0           | 3336.58   | 986567    |
| Tspan4   | 0.000463638 | 4.92382     | chr7  | 148651138   | 148671138  | 7301.73     | 10317     | 631092    |
| TIMP2    | 0.000412584 | 2.27031     | chr11 | 118206820   | 118226820  | 0           | 3410.04   | 2.52E+06  |

**Supplementary Table 1: Genes selected for siRNA knockdown in this study.** Fold change between Atrx- and Atrx+ mNPCs is shown along with associated *P* value. Associations with Atrx ChIP-seq peaks and ATAC-seq open and closed regions are determined by summing enrichment peak area within a  $\pm 10$  kb window surrounding the transcriptional start site in question. Transcriptional start and stop sites are also shown.

| <b>Antibody</b>      | <b>Application</b> | <b>Company</b>               | <b>Catalog Number</b> | <b>Concentration</b> |
|----------------------|--------------------|------------------------------|-----------------------|----------------------|
| Atrx (H-300)         | ChIP; WB           | Santa Cruz                   | sc-15408              | 40 ug; 1 : 200       |
| H3.3                 | ChIP               | Millipore<br>Cell Signaling  | 09-838                | 20 ug                |
| p53 (1C12)           | WB                 | Technology                   | 2524                  | 1 : 1000             |
| Vinculin             | WB                 | Sigma Aldrich                | V9264                 | 1 : 5000             |
| RhoA                 | WB                 | Cytoskeleton Inc.            | ARH04                 | 1 : 200              |
| GFAP                 | WB                 | Abcam                        | ab7260                | 1 : 10.000           |
| Tubb3                | WB; IF             | Abcam                        | ab7751                | 1 : 1000             |
| Olig2                | WB                 | Millipore                    | AB9610                | 1 : 2500             |
| IDH R132H            | WB                 | Dianova                      | DIA-H09               | 1 : 500              |
| GNA13                | WB; IHC            | Abcam                        | ab128900              | 1 : 1000; 1 : 250    |
| Caspase 3            | WB                 | Cell Signaling<br>Technology | 9665                  | 1 : 1000             |
| Cleaved Caspase<br>3 | WB                 | Cell Signaling<br>Technology | 9664                  | 1 : 1000             |

**Supplementary Table 2: Antibodies used in this study.** Application, commercial source, catalog number, and concentration of use also given.

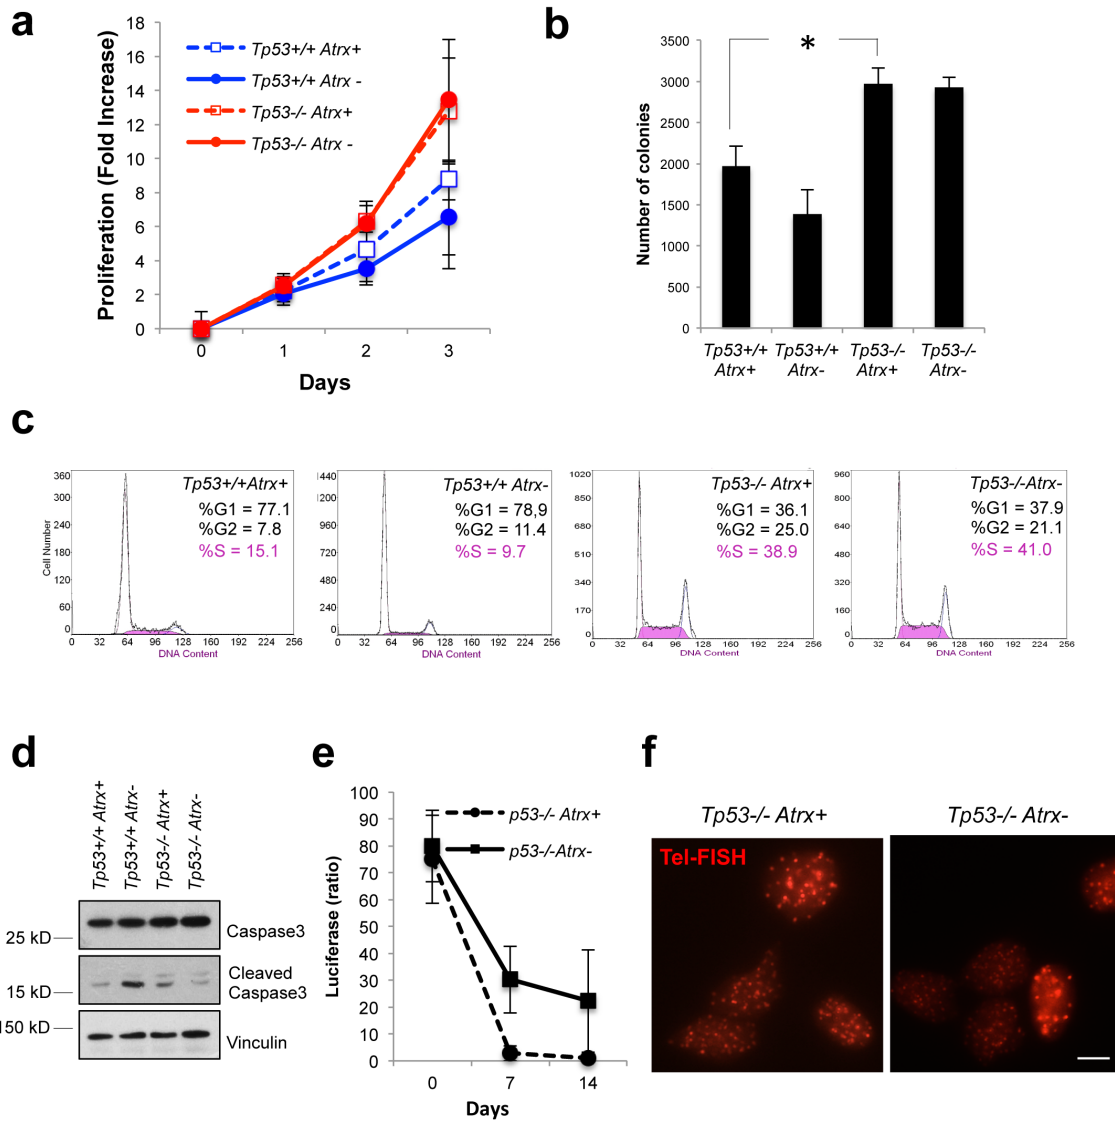

**Supplementary FIG. 1: Functional consequences of Atrx deficiency in mNPCs.** (a-b) Proliferation of mNPCs in adherent conditions (laminin coated plates, a) and in soft agar (b, \* $P = 0.002$ ; unpaired two-tailed t-test). Plots represent the average of three biological replicates. Error bars reflect standard deviation. c, propidium iodide cell cycle FACS analysis of mNPCs. d, western blot showing elevated cleaved caspase 3 in *Tp53*<sup>+/+</sup> *Atrx*<sup>-</sup> mNPCs (Vinculin loading control). e, luciferase quantification of *in vivo* growth of *Tp53*<sup>-/-</sup> *Atrx*<sup>+</sup> and *Tp53*<sup>-/-</sup> *Atrx*<sup>-</sup> mNPCs intracranially implanted into nude mice and monitored for 14 days; bars indicate standard error (9 mice/genotype). f, telomere FISH in *Tp53*<sup>-/-</sup> *Atrx*<sup>+</sup> and *Tp53*<sup>-/-</sup> *Atrx*<sup>-</sup> mNPCs showing no evidence of ALT in either line (scale bar 5 μm).

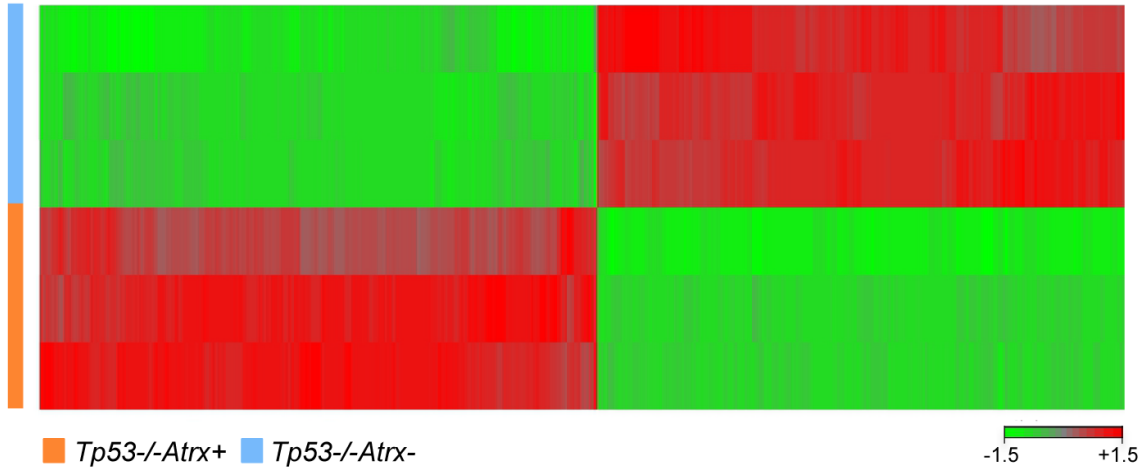

**Supplementary FIG. 2: Differential gene expression in *Tp53-/-* mNPCs arising with *Atrx* deficiency.** Heat map of differentially expressed genes (fold change > 2,  $Q < 0.01$ ; ANOVA FDR test) in *Tp53-/- Atrx+* and *Tp53-/- Atrx-* mNPCs.

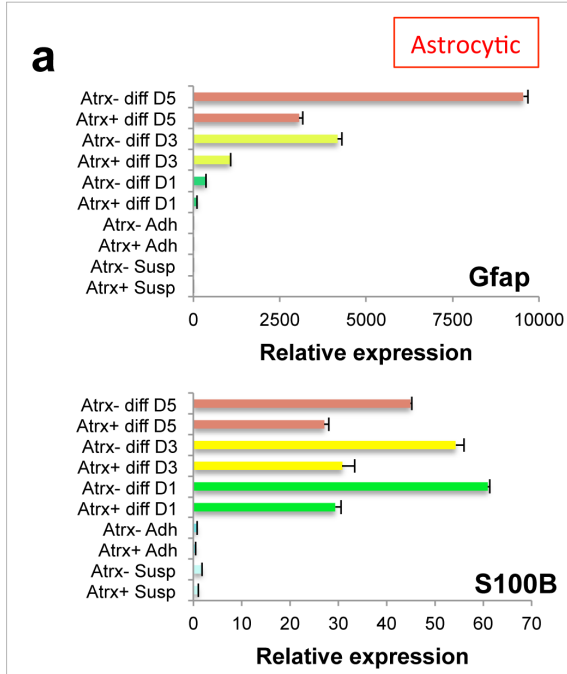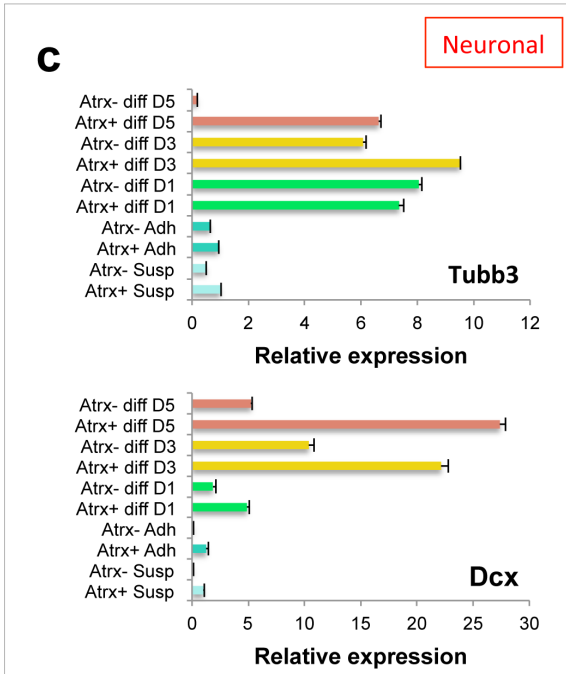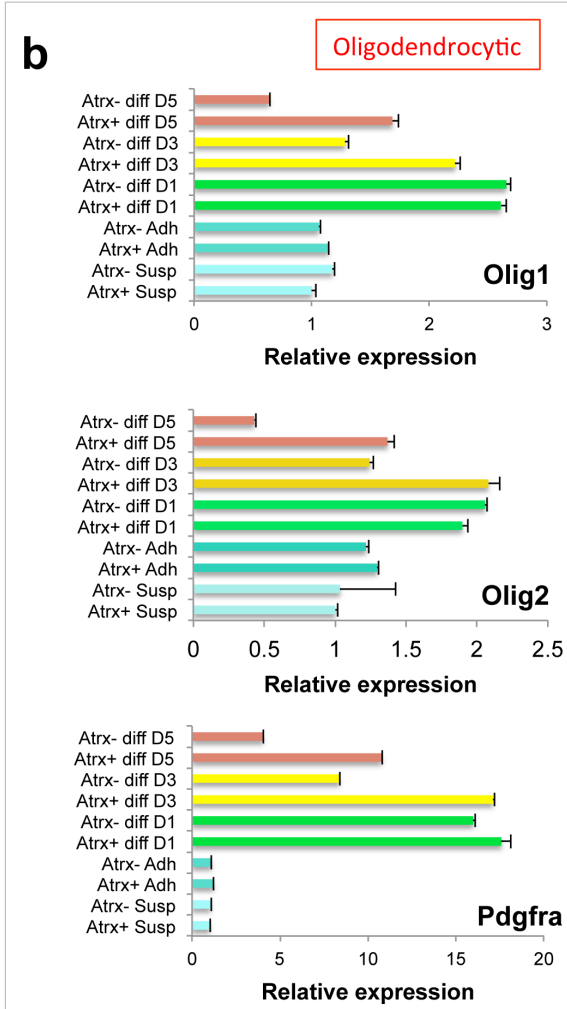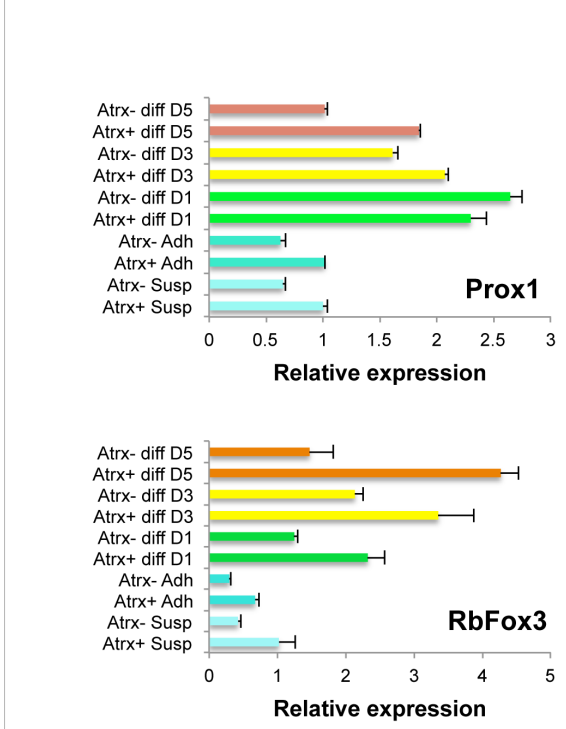

**Supplementary FIG. 3: Atrx deficiency alters mNPC differentiation profiles.** RT-qPCR analysis of astrocytic, oligodendrocytic and neuronal markers in *Atrx*<sup>+</sup> and *Atrx*<sup>-</sup> mNPCs (3 replicates per genotype) cultured in suspension (Susp), on laminin (Adh) and in differentiation conditions for the indicated number of days (D1-D5). Error bars reflect standard deviation.

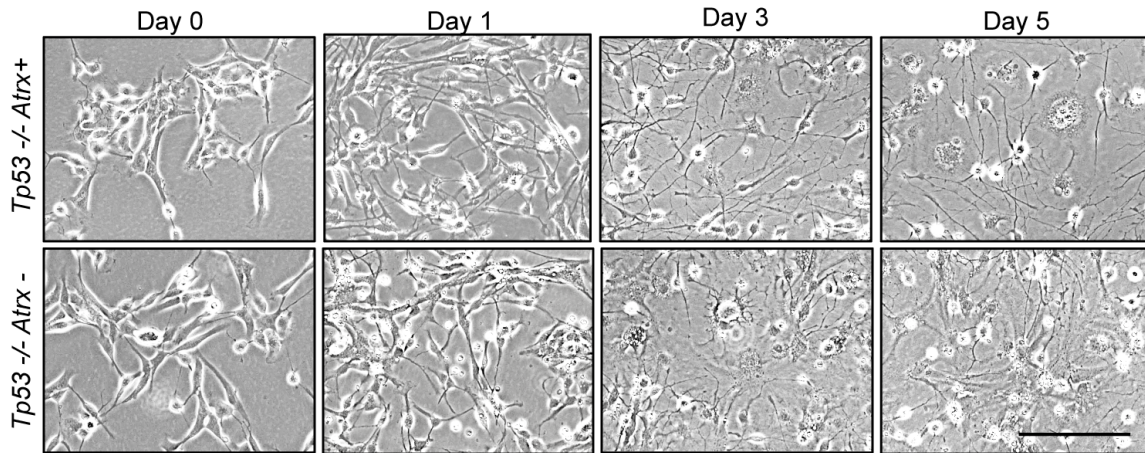

**Supplementary FIG. 4: *Atrx* deficiency impairs neuronal differentiation in mNPCs.** Phase-contrast micrographs of *Atrx*<sup>+</sup> and *Atrx*<sup>-</sup> mNPCs cultured in differentiation conditions for 1, 3 and 5 days (scale bar 50  $\mu$ m).

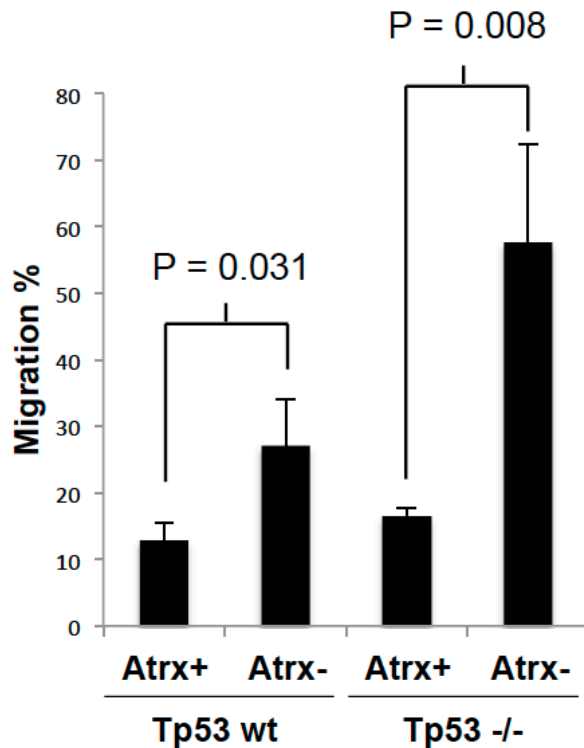

**Supplementary FIG. 5: *Atrx* deficiency promotes mNPC motility.** Transwell assay showing increased migratory behavior in *Atrx*<sup>-</sup> mNPCs, regardless of *Tp53* status. The impact of *Tp53* inactivation on mNPC motility was not significant ( $P = 0.098$ ). Error bars reflect standard deviation.  $P$  values determined by unpaired two-tailed t-test.



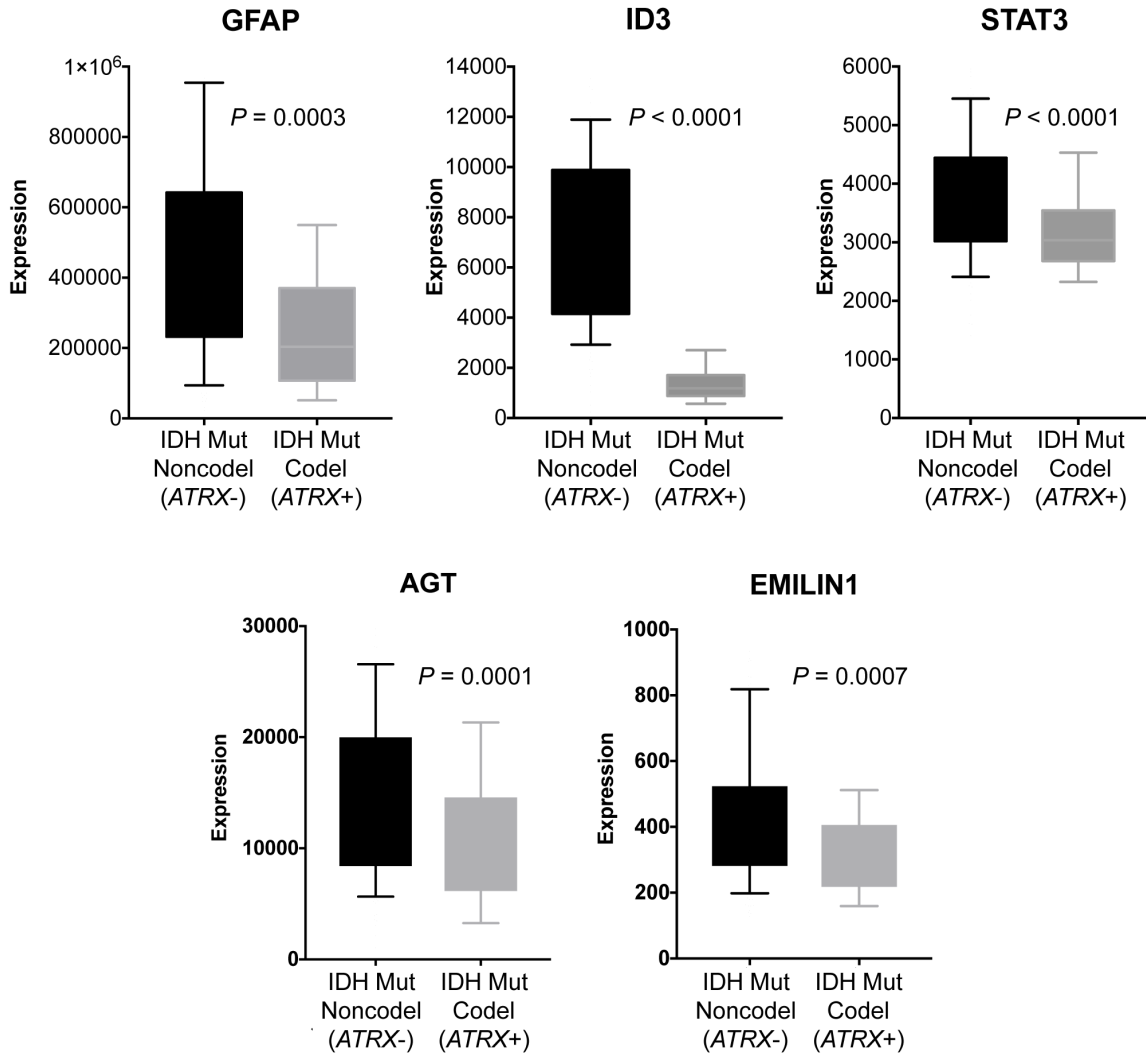

**Supplementary FIG. 6: Astrocytic marker/regulator and cell motility effector expression is upregulated in ATRX- human gliomas.** LGG expression data from TCGA showing levels of *GFAP*, *ID3*, *STAT3*, *AGT*, and *EMILIN1* expression in ATRX-intact (ATRX+) and ATRX-deficient (ATRX-) gliomas. Error bars reflect the 10-90 percentile spread. *P* values determined by unpaired two-tailed t-test.

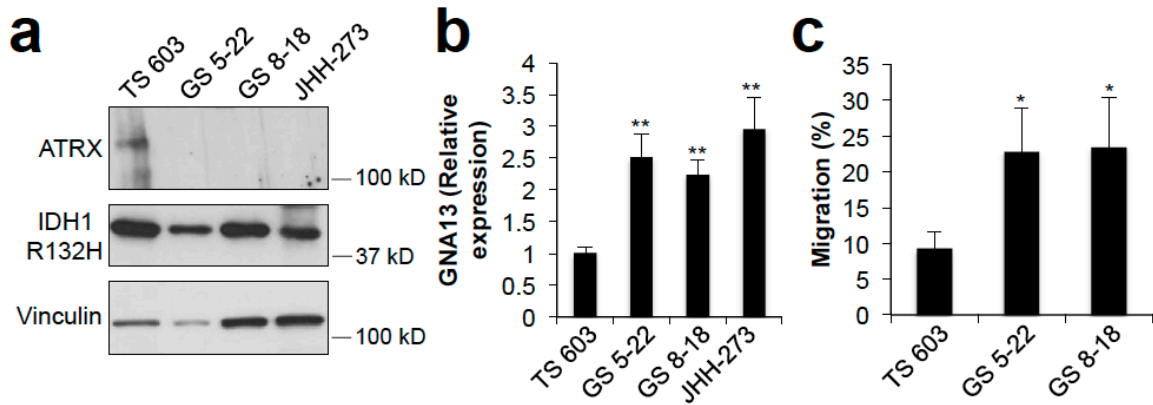

**Supplementary FIG. 7: ATRX deficiency downregulates GNA13 and increases cellular motility in GSCs.** a, western blot (a) showing IDH1 R132H and ATRX expression in TS 603, GS 5-22, GS 8-18, and JHH-273 GSCs (Vinculin loading control). JHH-273 cells are only passaged as xenografts. b, RT-qPCR (3 replicates) showing increased GNA13 expression across ATRX-deficient GSCs relative to TS 603. c, transwell migration assay (5 replicates) demonstrating increased motility in both GS 5-22 and GS 8-18 GSCs relative to TS 603 (\* $P = 0.02$ , \*\* $P < 0.003$ ; unpaired two-tailed t-test; error bars reflect standard deviation).

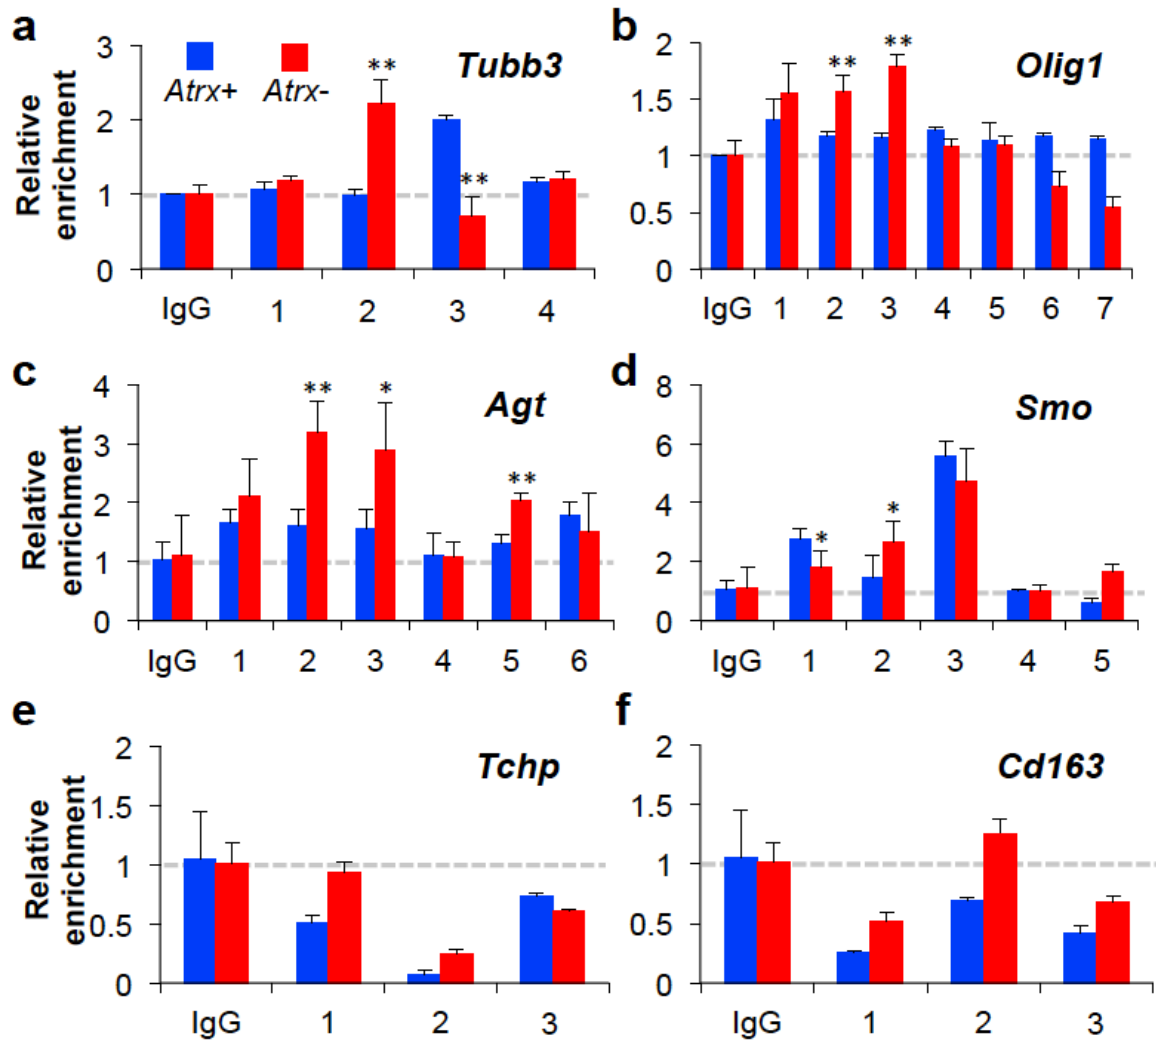

**Supplementary FIG. 8: Alterations in H3.3 composition at Atrx binding sites associated with Atrx-dependent differential gene expression.** H3.3 ChIP qPCR from Atrx-bound genomic loci approximating genes differentially expressed in the context of Atrx deficiency (a-d). In each case, multiple regions were amplified across the locus of interest (\* $P < 0.05$ , \*\* $P < 0.005$ ; unpaired two-tailed t-test). H3.3 was not enriched over baseline (IgG) in association with two genes (*Tchp* and *Cd163*) not associated with Atrx-dependent differential expression (e-f). Error bars reflect standard deviation.

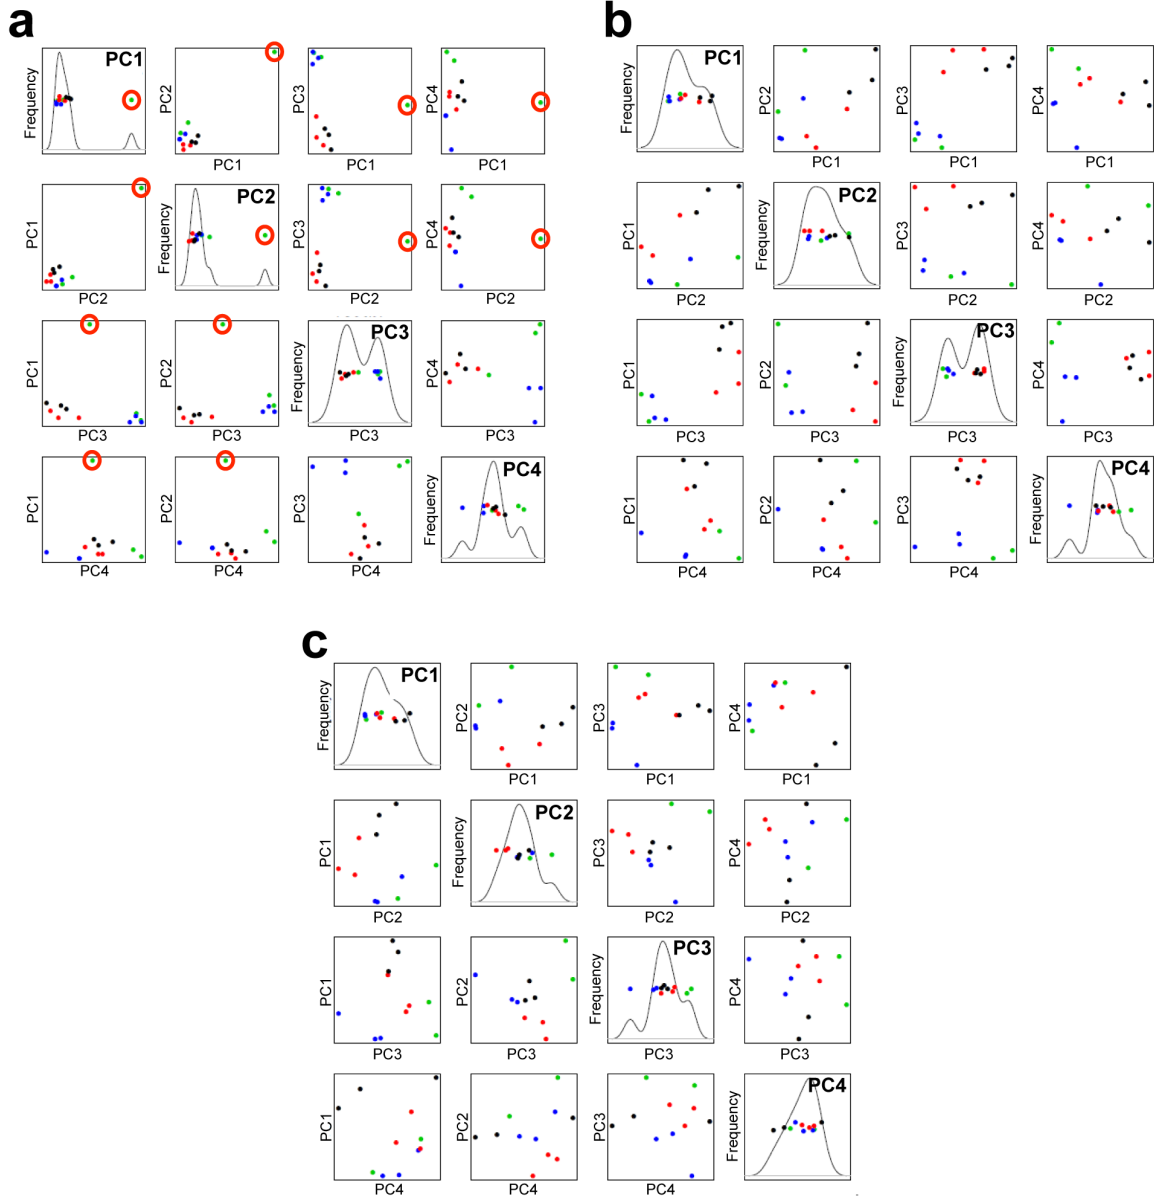

**Supplementary FIG. 9: Principal component analysis (PCA) of mNPC RNA-seq data.** PCA of raw data (a) reveals outlier sample (red circle) most prominently with reference to PC1 and PC2. b, PCA following exclusion of outlier sample. c, PCA following exclusion of outlier sample and median centering. mNPC genotypes indicated as follows: black: *Tp53*<sup>+/+</sup> *Atrx*<sup>+</sup>, red: *Tp53*<sup>+/+</sup> *Atrx*<sup>-</sup>, blue: *Tp53*<sup>-/-</sup> *Atrx*<sup>+</sup>, green: *Tp53*<sup>-/-</sup> *Atrx*<sup>-</sup>.

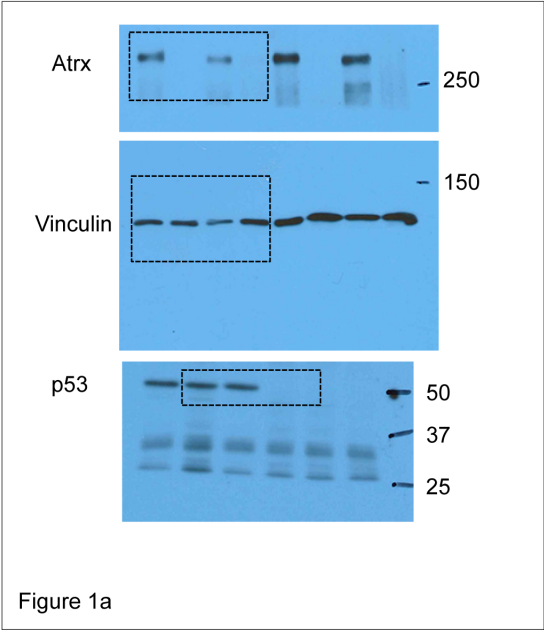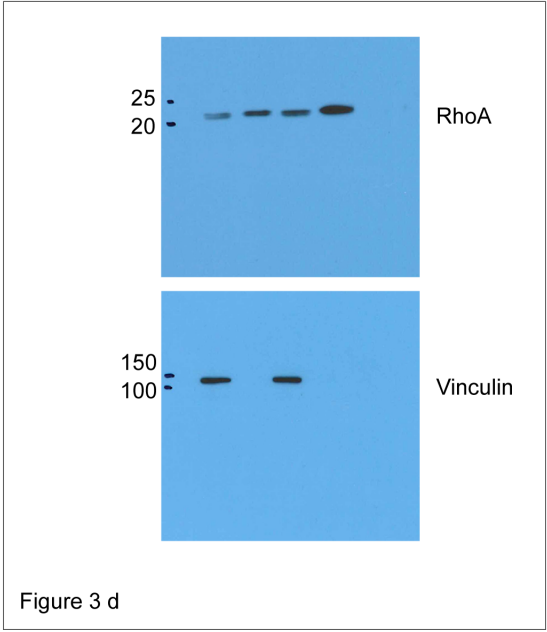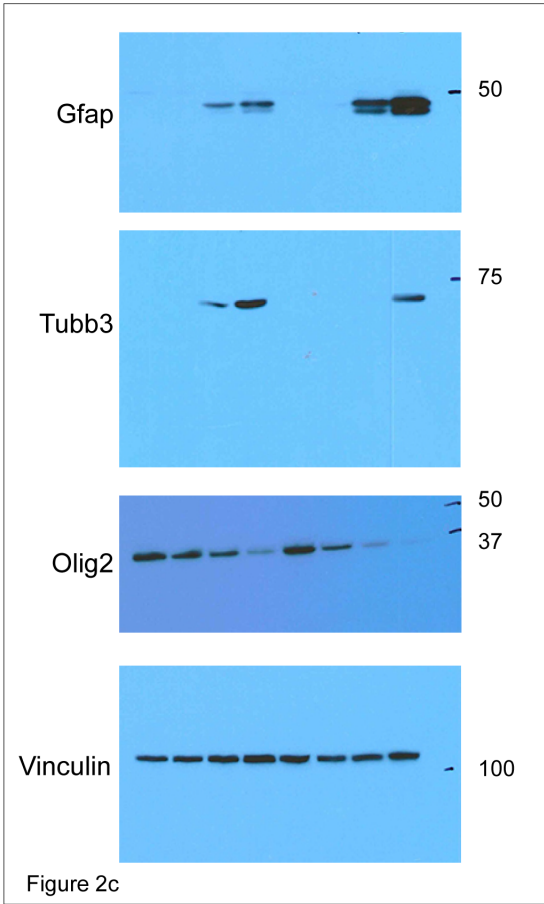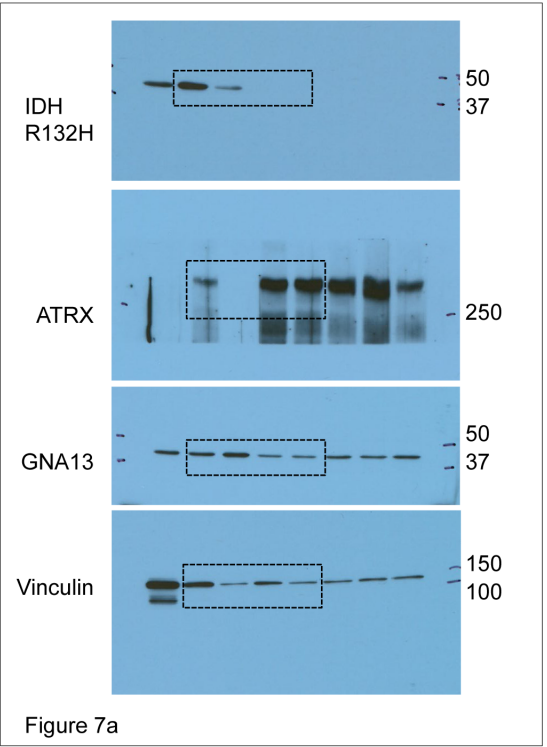

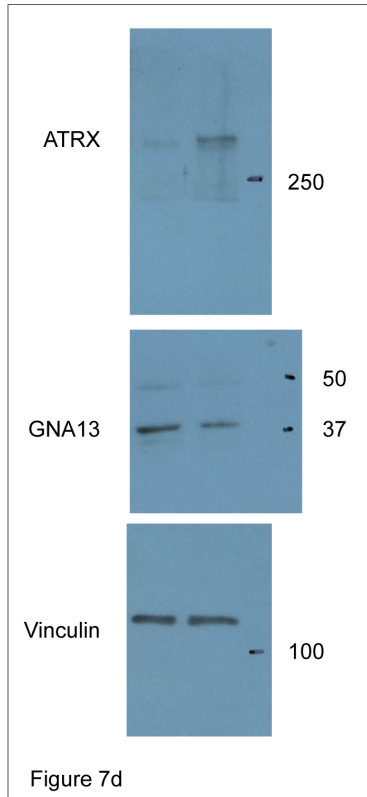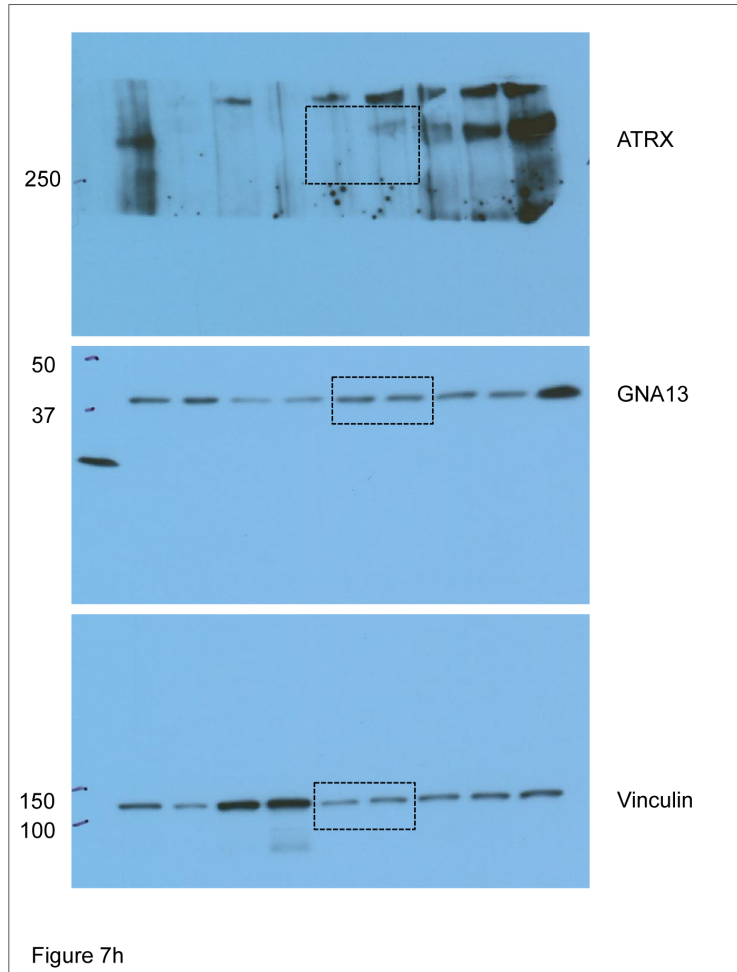

**Supplementary FIG. 10: Uncropped western blots used in main paper figures.** Molecular markers and paper figures associated with blots are indicated, as is the extent of horizontal cropping, when applicable. Molecular weight markers are in kD.
