# Supplementary material for: Atrx inactivation drives disease-defining phenotypes in glioma cells of origin through global epigenomic remodeling
Source: PubMed Central journal article supplement (PMC5849741; doi:10.1038/s41467-018-03476-6), 2018-03-13
Supplement: 41467_2018_3476_MOESM3_ESM.pdf [file 41467_2018_3476_MOESM3_ESM.pdf]

## Description of Additional Supplementary Files

File Name: Supplementary Data 1

Description: Differential gene expression and associated Atrx CHIP-seq peaks and ATAC-seq open and closed regions. Fold change between Atrx- and Atrx+ mNPCs is shown along with associated P value. Associations with Atrx CHIP-seq peaks and ATAC-seq open and closed regions (red) are determined by summing enrichment peak area within a  $\pm 10$  kb window surrounding the transcriptional start site in question. Transcriptional start and stop sites are also shown.

File Name: Supplementary Data 2

Description: Atrx CHIP-seq enrichment peaks for Tp53+/+ mNPCs.

File Name: Supplementary Data 3

Description: Atrx CHIP-seq enrichment peaks for Tp53-/- mNPCs.

File Name: Supplementary Data 4

Description: ATAC-seq open regions arising with Atrx deficiency in mNPCs.

File Name: Supplementary Data 5

Description: ATAC-seq closed regions arising with Atrx deficiency in mNPCs.

File Name: Supplementary Data 6

Description: Genomic sites of significant differential H3.3 composition arising with Atrx deficiency in mNPCs.

File Name: Supplementary Data 7

Description: Primers used for genotyping and RT-qPCR in this study.

File Name: Supplementary Data 8

Description: Primers used for CHIP-qPCR in this study
